## **Cigarette Smoking-Associated Isoform Switching and 3' UTR Lengthening Via Alternative**

### **Polyadenylation**

Zhonghui Xu<sup>1,2</sup>, John Platig<sup>1,2</sup>, Sool Lee<sup>1,2</sup>, Adel Boueiz<sup>1,3</sup>, Rob Chase<sup>1,2</sup>, Dhawal Jain<sup>4</sup>, Andrew Gregory<sup>1,2</sup>, Rahul Suryadevara<sup>5</sup>, Seth Berman<sup>5</sup>, Russell Bowler<sup>6</sup>, Craig P. Hersh<sup>1,2,3</sup>, Alain Laederach<sup>7</sup>, Peter J. Castaldi<sup>1,2,8</sup> for the COPDGene Investigators

<sup>1</sup>Channing Division of Network Medicine, Brigham and Women's Hospital, Boston, MA, USA; <sup>2</sup>Harvard Medical School, Boston, MA, USA; <sup>3</sup>Division of Pulmonary and Critical Care Medicine, Brigham and Women's Hospital, Boston, MA, USA; <sup>4</sup>Pulmonary Drug Discovery Laboratory, Bayer US LLC. Pharmaceuticals, Research & Development, Boston, MA, USA; <sup>5</sup>Northeastern University, Boston, MA, USA; <sup>6</sup>Division of Pulmonary and Critical Care Medicine, National Jewish Health, Denver, CO, USA; <sup>7</sup>Department of Biology, University of North Carolina at Chapel Hill, Chapel Hill, NC, USA; <sup>8</sup>Division of General Internal Medicine and Primary Care, Brigham and Women's Hospital, Boston, MA, USA

Corresponding Author:

Peter Castaldi, MD, MSc

Channing Division of Network Medicine

181 Longwood Ave

Boston, MA 02115

[peter.castaldi@channing.harvard.edu](mailto:peter.castaldi@channing.harvard.edu)

## **Abstract**

### **Background**

Cigarette smoking accounts for approximately one in five deaths in the United States. Previous genomic studies have primarily focused on gene level differential expression to identify related molecular signatures and pathways, but the genome-wide effects of smoking on alternative isoform regulation and posttranscriptional modulation have not yet been described.

### **Results**

We conducted RNA sequencing (RNA-seq) in whole-blood samples of 454 current and 767 former smokers in COPDGene Study. We assessed the association of current smoking with differential expression of genes and isoforms and differential usage of isoforms and exons. At 10% FDR, we detected 3,167 differentially expressed genes, 2,014 differentially expressed isoforms, 945 differentially used isoforms and 160 differentially used exons. Genes containing differentially used isoforms were enriched in biological pathways involving GTPase activity and innate immunity. The majority of these genes were not differentially expressed, thus not identifiable from conventional differential gene expression analysis. Isoform switch analysis revealed for the first time widespread 3' UTR lengthening associated with cigarette smoking, where current smokers were found to have higher expression and usage of isoforms with markedly longer 3' UTRs. The lengthening of 3' UTRs appears to be mediated through alternative usage of distal polyadenylation sites, and these extended 3' UTR regions are significantly enriched with functional sequence elements including adenylate-uridylylate (AU)-rich elements, microRNA and RNA-protein binding sites. Expression quantitative trait locus analyses on differentially used 3' UTRs identified 79 known GWAS variants associated with multiple smoking-related human diseases and traits.

### **Conclusions**

Smoking elicits widespread transcriptional and posttranscriptional alterations with disease implications. It induces alternative polyadenylation (APA) events resulting in a switch towards the

usage of isoforms with strikingly longer 3' UTRs in genes related to multiple biological pathways including GTPase activity and innate immunity. The extended 3' UTR regions are enriched with functional sequence elements facilitating post-transcriptional regulation of protein expression and mRNA stability. These findings warrant further studies on APA events as potential biomarkers and novel therapeutic targets for smoking-related diseases.

## 1 Introduction

2 Cigarette smoking is a major risk factor for a wide range of diseases including cancers,  
3 cardiovascular and respiratory diseases. Approximately one in five deaths in the United States is  
4 attributable to smoking<sup>1-5</sup>. Globally, smoking-related annual mortality is projected to rise from 3  
5 million in 1995 to 10 million by 2030, with 70% of these deaths occurring in developing countries<sup>2</sup>.  
6 The associated socioeconomic burden is enormous, with the proportion of health care expenditure  
7 in the US attributable to smoking estimated to range between 6% and 18% across different states<sup>6</sup>.

8 Smoking cessation has been shown to reverse many smoking-related adverse health effects  
9 and substantially reduce mortality<sup>2,7</sup>. At the molecular level, the majority of smoking-deregulated  
10 genes revert to normal expression levels following smoking cessation, while a smaller subset of genes  
11 remain persistently altered in former smokers<sup>8,9</sup>. While these genomic studies shed light on smoking-  
12 related transcriptional modulations at the gene level, few studies have investigated the effect of  
13 smoking on alternative isoform regulation. Most multi-exon human genes are expressed in multiple  
14 transcript isoforms, and alternative expression of these isoforms are modulated through multiple  
15 mechanisms including alternative splicing, alternative promoter usage and alternative  
16 polyadenylation. With regulatory impacts on mRNA and protein localization, stability and functional  
17 interactions, alternative isoform regulation plays an important role in tissue and cell type specificity  
18 and disease susceptibility<sup>10-13</sup>.

19 In a previous RNA-seq analysis of 515 current and former smokers, we identified instances of  
20 differential exon usage predominantly localized to the first or last exons of the involved transcripts,  
21 indicating smoking-related alterations in transcription initiation or termination<sup>14</sup>. In the current study,  
22 we characterized alternative isoform regulation and associated biological pathways in response to  
23 cigarette smoking in a larger RNA-seq sample of 1,221 current and former smokers in the COPDGene  
24 Study. We quantified transcriptomic alterations at the gene, isoform and exon level, and analyzed the

25 consequences of alternative isoform usage (i.e. isoform switching<sup>15</sup>). We discovered a widespread  
26 switch in current smokers toward increased usage of isoforms with markedly longer 3' UTRs. This was  
27 mediated through alternative usage of distal polyadenylation sites and resulted in the acquisition of  
28 additional binding sites for microRNAs (miRNAs) and other functional elements.

29

## 30 **Methods**

### 31 **Study subjects**

32 This study includes 454 current smokers and 767 former smokers from COPDGene Study<sup>16</sup>.  
33 Self-identified non-Hispanic whites and African Americans between the ages of 45 and 80 years with  
34 a minimum of 10 pack-years lifetime smoking history were enrolled at 21 centers across the United  
35 States. COPDGene conducted two study visits approximately five years apart, and additional  
36 longitudinal follow-up of this cohort is ongoing. At the second study visit, complete blood count (CBC)  
37 data and PaxGene RNA tubes were collected. Smoking history was ascertained by self-report.  
38 Participants defined as current smokers answered yes to the question “Do you smoke cigarettes now  
39 (as of one month ago?)”, and for a subset of subjects smoking status was confirmed by serum cotinine  
40 measurement. Institutional review board approval and written informed consent was obtained for all  
41 subjects.

### 42 **Cotinine measurement**

43 Cotinine measurements were obtained from plasma samples of subjects in two COPDGene  
44 clinical centers (National Jewish Health and University of Iowa). Plasma was collected using an 8.5 mL  
45 p100 tube (Becton Dickinson), and global metabolite data was generated using the Metabolon Global  
46 Metabolomics Platform (Durham, NC, USA). The data were normalized to remove batch effects<sup>17</sup>.

### 47 **RNA extraction, sequencing and expression quantification**

48 Total RNA was extracted from peripheral blood samples, and paired end reads were generated  
49 from Illumina sequencers and aligned to the GRCh38 genome (Supplementary Text 1). GTF annotation  
50 was downloaded from Biomart Ensembl database (Ensembl Genes release 94, GRCh38.p12 assembly)  
51 on October 21, 2018. Exons from the GTF were broken into disjoint parts (exonic parts) sharing a  
52 common set of transcripts<sup>18</sup>. Sequencing read counts on genes and exonic parts were generated from  
53 featureCounts in Rsubread<sup>19</sup> (v1.32.2). Isoform expression estimates were obtained using Salmon<sup>20</sup>  
54 (v0.12.0) and tximport<sup>21</sup> (v1.10.0).

### 55 **Filtering, normalization, differential expression and usage analysis**

56 Low expressed genomic features were filtered before applying TMM<sup>22</sup> normalization from  
57 edgeR<sup>23</sup> (v3.24.3) (Supplementary Text 1). To test for differential expression of genomic features  
58 between current and former smokers, we employed the linear modeling approach implemented in  
59 limma<sup>24,25</sup> (v3.38.3), where the mean-variance relationship is accounted for by applying observation-  
60 specific weights estimated from voom<sup>26</sup>. We adjusted for covariates including age, race, gender, total  
61 pack-years of exposure, forced expiratory volume in one second (FEV<sub>1</sub>), complete blood cell count  
62 proportions and library prep batch. To test differential usage of isoforms and exonic parts, we used  
63 diffSplice from limma. False discovery rate (FDR) was controlled with Benjamini-Hochberg  
64 procedure<sup>27</sup>. A significance cutoff of 10% FDR was used. To better visualize the differential usage  
65 result, we developed a procedure to derive a variance stabilizing transformation (VST) on counts  
66 based on the mean-variance relationship in voom (Supplementary Text 2).

### 67 **Gene set enrichment analysis**

68 Gene ontology<sup>28,29</sup> (GO) biological function enrichment of gene sets derived from differential  
69 expression and usage analysis were assessed via Fisher exact test statistic with weight01 algorithm  
70 available in topGO (v2.33.1) that accounts for dependency in GO topology<sup>30</sup>. P-value < 0.05 was  
71 considered significant.

### 72 **Isoform switch analysis**

73 Isoforms identified from differential usage analysis were further examined for their splicing  
74 patterns relative to a synthetic pre-RNA in their parent genes using IsoformSwitchAnalyzerR  
75 (v1.12.0)<sup>31</sup>. Eight categories of splicing events were characterized, including exon skipping (ES),  
76 multiple exon skipping (MES), mutually exclusive exons (MEE), intron retention (IR), alternative 5'  
77 splice site (A5), alternative 3' splice site (A3), alternative transcription start site (ATSS) and alternative  
78 transcription termination site (ATTS). By pairwise comparison between down-used and up-used  
79 isoforms, we examined eight aspects of isoform switch consequences – namely, changes in overall  
80 isoform length, 3' UTR length, 5' UTR length, number of exons, intron retention, sensitivity to  
81 nonsense-mediated mRNA decay (NMD), location of transcription start site (Tss) and transcription  
82 termination site (Tts). The net effects of these splicing events and switch consequences were  
83 aggregated at the gene level and tested for statistical significance using a binomial test.

#### 84 **Sequence and motif analysis**

85 Genomic annotations of polyadenylation cleavage sites (PASs), AU-rich elements (AREs),  
86 miRNAs and RNA-binding proteins (RBPs) binding sites were collected from multiple sources  
87 (Supplementary Text 1). Flanking sequences of PASs were searched for polyadenylation [poly(A)]  
88 signal motifs of AATAAA and TTTTTTTT. Frequencies of these annotated sequence elements and  
89 identified poly(A) signal motifs were computed, smoothed and visualized at each position of a given  
90 set of equal-length sequences extracted based on some criterion (e.g. sequences up to 60 nucleotides  
91 [nts] upstream of PASs in 3' UTR exonic parts that were up-used in smokers).

#### 92 **Statistical, network and eQTL analysis**

93 Demographic differences between current and former smokers were assessed via Student's t-  
94 test and Pearson's Chi-squared test for continuous and categorical variables, respectively. Isoform  
95 and exonic part length comparisons were performed using the Wilcoxon signed rank test. Enrichment  
96 tests of sequence elements in 3' UTRs were performed using Fisher's exact test. To account for  
97 difference in 3' UTR lengths, we repeated the enrichment analysis limiting to the last 100 nts at 3' end

98 of the UTRs. To identify individual miRNA and RBPs whose binding sites were enriched at a higher  
99 density in 3' UTRs, we conducted a binomial test with the hypothesized probability of success equal  
100 to the ratio of the sum of the lengths of the 3' UTRs of interest over the total length of 3' UTRs. The  
101 identified individual miRNAs, RBPs and their target genes were visualized as a directed regulatory  
102 network using the Fruchterman-Reingold layout<sup>32</sup>, and network communities were detected using a  
103 multi-level modularity optimization algorithm implemented in igraph R package (v1.2.5).

104 Expression quantitative trait locus (eQTL) analyses were performed to test for association  
105 between single nucleotide polymorphisms (SNPs) within 1MB *cis* window and the expression values  
106 of genes and exonic parts in 796 NHW subjects in COPDGene. SNPs with minor allele frequency > 5%  
107 were tested. Expression values were regressed on additively coded SNP genotypes using linear  
108 regression implemented in MatrixQTL<sup>33</sup>. The models were also adjusted for age, gender, principal  
109 components of genetic ancestry, and 35 PEER factors obtained from the expression data<sup>34</sup>. The  
110 identified QTLs at 5% FDR cutoff were cross-referenced against the NHGRI-EBI GWAS catalog accessed  
111 on May 07, 2021 using makeCurrentGwascat from gwascat (v2.13.5), and visualized with  
112 LocusZoom<sup>35</sup>.

### 113 **Data availability**

114 The gene, isoform and exon count data used for this analysis are available in GEO<sup>36,37</sup>  
115 (accession number GSE171730). A Shiny app to explore and visualize the data and result is available  
116 at [http://cdnm-castaldi.org/smoking\\_deu\\_2021/](http://cdnm-castaldi.org/smoking_deu_2021/).

117

## 118 **Results**

### 119 **Differential gene expression**

120 The demographics and clinical characteristics of the study subjects (454 current smokers and  
121 767 former smokers) are summarized in Supplementary Table ST1. In a subset of subjects, serum



122 cotinine levels confirmed the general accuracy of subjects' self-reported smoking behavior in the  
123 COPDGene Study (Supplementary Fig. SF1). To evaluate gene expression changes in peripheral blood  
124 in response to active cigarette smoking, we obtained gene level RNA-seq counts, and performed  
125 differential gene expression (DGE) analysis comparing current versus former smokers while adjusting  
126 for other demographic and clinical covariates. Out of 22,020 genes evaluated, we identified 1,542 up-  
127 regulated and 1,625 down-regulated genes at 10% FDR (Supplementary Fig. SF2, Supplementary  
128 Table ST2). The top ten DGE genes are listed in Table 1. We then performed GO enrichment analyses  
129 on DGE genes and found 335 over-represented biological processes with various aspects of  
130 inflammation and platelet activation topping the list (Supplementary Table ST3).

### 131 **Differential expression and usage of isoforms**

132 We next generated Salmon estimates of isoform expression and assessed differential isoform  
133 expression (DIE) between current and former smokers. Out of 85,437 isoforms tested, 1,026 up-  
134 regulated and 988 down-regulated isoforms were identified at 10% FDR (Supplementary Table ST4,  
135 Supplementary Fig. SF3). These isoforms map to 1,547 genes, 77% (1190/1547) of which were also  
136 differentially expressed in DGE analysis. The vast majority (1347/1547 = 87%) of these genes had  
137 multiple expressed isoforms, and for 64% (860/1347) of these genes the dominant isoform (i.e. most  
138 highly expressed isoform) was differentially expressed. GO enrichment analysis identified 290 over-  
139 represented biological processes (Supplementary Table ST5), 37% of which were also identified in the  
140 DGE enrichment analysis.

141 Unlike DIE, differential isoform usage (DIU) analysis detects changes in the fractional  
142 composition of isoforms originating from the same parent gene (i.e. isoform switch<sup>15</sup>). We identified  
143 389 up-used and 556 down-used isoforms (Supplementary Table ST6), corresponding to 804 genes of  
144 which 31% (250/804) were also differentially expressed in the DGE analysis (Supplementary Fig. SF4).  
145 Interestingly, DIU occurred largely in non-dominant isoforms (646/804=80%). GO enrichment analysis  
146 of genes containing DIU isoforms identified 100 over-represented biological processes

147 (Supplementary Table ST7), 12% of which overlapped with the DGE enrichment results. The most  
148 enriched biological processes include GTPase activity, Wnt-signaling, and regulation of innate  
149 immunity. The top ten DIU isoforms and enriched GO terms are shown in Tables 2 and 3, respectively.

### 150 **Alternative splicing events and consequences**

151 Isoform switches identified from the DIU analysis can be further analyzed to characterize  
152 specific splicing events and potential consequences<sup>31</sup>. An example isoform switch in Sestrin 3 (*SESN3*)  
153 is shown in Fig. 1a. The down-used and up-used isoforms in *SESN3* have distinct splicing patterns that  
154 could result in multiple potential consequences at the RNA and protein level.

155 By comparing splicing patterns between isoforms, we identified six categories of alternative  
156 splicing events prevalent in smoking-associated DIU isoforms, three of which (alternative  
157 transcription start site, alternative termination site, and intron retention) seem to be slightly more  
158 prevalent in the up-used isoforms (Supplementary Text 1). We next assessed the consequences of  
159 switching from down-used to up-used isoforms on eight isoform characteristics including UTR length,  
160 position of transcription start and termination site, intron retention, and sensitivity to NMD. We  
161 found isoform switching resulted in higher usage of isoforms that had longer overall length, longer 3'  
162 UTRs, and fewer exons ( $p < 0.05$  for all, Fig. 1b-c). In the example of *SESN3*, the up-used isoform has  
163 a longer isoform length due primarily to marked elongation of the 3' UTR (7,742 nucleotides [nts] vs  
164 107 nts in the down-used isoform).

### 165 **Smoking-associated increased usage of isoforms with extremely long 3' UTRs**

166 To further examine the significant isoform switch consequences related to length, we  
167 compared the length distribution of up-used, down-used, and non-DIU isoforms in genes identified  
168 through DIU analysis. We observed that isoforms up-used in current smokers were notably longer  
169 (median isoform lengths 2997 nts, 2323 nts, and 1221 nts for up-used, down-used, and non-DIU  
170 isoforms, respectively). The smoking-related transcript elongation occurred primarily in the coding

171 region sequence (CDS) and 3' UTRs but not in 5' UTRs (Fig. 2). We also noted a strong correlation  
172 between CDS length and 3' UTR length in all analyzed isoforms (Spearman rho = 0.78).

173 Since these isoform-level analyses depend on the reliability of isoform expression estimation,  
174 we also performed differential exon usage (DEU) analysis on exonic part read counts directly  
175 supported by alignments. Exonic parts were derived from transcriptome annotations as described in<sup>18</sup>  
176 and illustrated in Fig. 3a. We identified 126 up-used and 34 down-used exonic parts contained within  
177 128 genes (Supplementary Table ST8). Forty-five percent (57/128) of these genes were also  
178 differentially expressed, 74% (42/57) of which were down-regulated.

179 Analysis on DEU exonic parts lengths confirmed the switch toward isoforms with extremely  
180 long 3' UTRs (Fig. 3b). Differentially used 3' UTRs (DEU 3' UTRs) accounted for 40% (64/160) of all  
181 identified DEU exonic parts, nearly all (56/64) of which were up-used in current smokers. Of the genes  
182 containing a DEU 3' UTR, about half (26/54) were differentially expressed with the large majority  
183 (19/26) showing decreased expression in current smokers. GO enrichment analysis of genes with up-  
184 used DEU 3' UTRs identified over-representation of transcriptional regulation (e.g. polyadenylation  
185 and miRNA binding), Wnt-signaling and NF-kB signaling (Supplementary Table ST9). In summary,  
186 smoking results in marked 3' UTR elongation that tends to be associated with a reduction in overall  
187 expression for the affected genes.

### 188 **Elongation of 3' UTRs is not an artifact of transcript length bias**

189 Transcript length bias in RNA-seq data analysis can arise when statistical power to detect  
190 differential expression is greater for longer isoforms, due to the fact that read counts are proportional  
191 to not only expression levels but also transcript lengths<sup>38</sup>. To determine whether the observed  
192 smoking-associated 3' UTR elongation is driven by length bias, we compared our analysis on data  
193 where smoking status was randomly permuted. The results of this permutation analysis demonstrate  
194 that the magnitude of length-related effects observed in the non-permuted analysis far exceeds the  
195 effects seen with permutation, and that the directional preference of positive log-fold-changes for

196 longer 3' UTR isoforms in current smokers is absent in the permuted data (Fig. 4). These results  
197 indicate that the observed smoking-associated 3' UTR elongation is not driven by transcript length  
198 bias.

### 199 **Alternative polyadenylation mediates 3' UTR elongation**

200 We next sought to determine whether smoking-associated 3' UTR lengthening occurs in a  
201 controlled manner through transcriptional termination mechanisms involving alternative  
202 polyadenylation (APA). To test the hypothesis on alternative polyadenylation site (PAS) usage, we  
203 assessed whether annotated PAS are enriched within up-used 3' UTRs. The majority of up-used 3'  
204 UTRs (50/56) contained at least one annotated PAS, representing a thirtyfold enrichment over all  
205 other tested 3' UTRs within the same genes (OR = 30.1, P-value < 0.001), and a twentyfold enrichment  
206 over 3' UTRs across all genes. These enrichment scores remain highly significant when each 3' UTR is  
207 trimmed to the last 100 nts at its 3' end (Table 4, poly(A) sites). In contrast, PAS were identified in  
208 only 25% of down-used 3' UTRs. We also observed at least one PAS in close proximity to the distal  
209 boundary of up-used 3' UTRs (median distance of 7 nts), consistent with the hypothesis that the 3'  
210 UTR extension is mediated through alternative usage of PAS.

211 To ascertain whether there were any differences in strength of PAS in up-used 3' UTRs relative  
212 to PAS in other 3' UTRs in the same genes, we examined the frequency of the canonical poly(A) motif  
213 (AATAAA) as a surrogate for overall PAS strength. We focused on externally verified PAS within the  
214 last 100 nts of a 3' UTR exonic part, and we counted instances in which AATAAA motifs were located  
215 within 60 nts upstream of a PAS. We found PASs in up-used 3' UTRs had a higher frequency of AATAAA  
216 motifs than PAS in non-DEU 3' UTRs from the same genes (44.7% versus 29.8%). The presence of  
217 AATAAA motifs was also correlated to exonic part differential usage P-values (Spearman rho = 0.19)  
218 and log-fold-changes (Spearman rho = 0.26). A similar pattern was observed for another strong  
219 poly(A) motif TTTTTTTT (Fig. 5 a-c).

220 To determine the localization of our DEU 3' UTRs, we classified all exonic parts in genes  
221 containing DEU 3' UTRs as distal (located at the gene end) and proximal (located at an upstream 3'  
222 UTR). Fifty-two percent (29/56) of DEU 3' UTRs were distal, and the frequency of the canonical poly(A)  
223 motif in these genes was highest in distal PASs (52.3%), compared to 35.9% for proximal PASs.  
224 Similarly, we found the highest frequency of poly(A) motif TTTTTTTTT at distal PASs. The positional  
225 frequencies of these motifs are shown in Fig. 5 d-e. This analysis highlights the predominant  
226 localization of DEU 3' UTRs at gene ends with strong distal poly(A) signals.

### 227 **Enrichment of functional regulatory elements in smoking-elongated 3' UTRs**

228 3' UTRs often harbor functional binding sites that regulate mRNA stability and localization,  
229 and previous work has shown that some transcripts with longer 3' UTRs harbor repressive elements  
230 in extended 3' UTR regions<sup>39</sup>. These functional sites often reside in adenylate-uridylate (AU)-rich  
231 elements that serve as regulatory hotspots characterized by joint binding of regulatory factors such  
232 as RBPs and miRNAs<sup>40</sup>.

233 Using the core pentamer motif of AREs (AUUUA), we found that AREs are significantly enriched  
234 in up-used 3' UTRs relative to non-smoking associated 3' UTRs (OR = 35.9, P-value < 0.001). When  
235 considering the density of AREs per unit length of 3' UTR, ARE sites also occur at significantly higher  
236 frequency in up-used 3' UTRs. We also observed enrichment of Targetscan predicted miRNA binding  
237 sites (OR = 7.8, P-value < 0.001) within up-used 3' UTRs (Table 4). The chance of co-occurrence of  
238 these functional elements (including PAS) in up-used 3' UTRs is significantly higher (Supplementary  
239 Table ST10). Positional frequency analysis clearly demonstrates an enriched distribution of PASs,  
240 AREs, and miRNA binding sites over the elongated 3' UTRs, especially at the distal end (Fig. 6).

241 Extending the global enrichment analysis to individual regulatory factors, we identified five  
242 miRNAs and three RBPs whose binding sites were enriched in up-used 3' UTRs. To explore putative  
243 coordination between these miRNAs and RBPs, a regulatory network of these entities and their target  
244 genes were constructed. Using a community detection algorithm, we identified five communities

245 (modularity score 0.32) of dense connections, including four connected communities and one isolated  
246 RBP community (MATR3). Interestingly, *AGO2*, a member of the largest community, is a target for  
247 both the top 2 miRNA candidates and the top 2 RBP candidates, suggesting that these miRNAs and  
248 RBPs may act in a coordinated manner in post-transcriptional regulation of *AGO2* and other target  
249 genes (Fig. 7). *AGO2* protein is essential to miRNA and siRNA-mediated post-transcriptional gene-  
250 silencing, and the most distal 3' UTR of *AGO2* is up-used in response to smoking (q-value = 7.78e-8).

### 251 **Alternative polyadenylation is implicated in smoking-related human diseases and traits**

252 To relate smoking-induced alternative polyadenylation with human diseases and traits, we  
253 first performed eQTL analysis to identify genetic variants within a 1MB *cis* window associated with  
254 the expression level of smoking-related DEU 3' UTRs. We found 2,840 significant QTLs at 5% FDR for  
255 29 DEU 3' UTRs in 25 genes. The majority (2582/2840 = 90.9%) of these QTLs were specifically  
256 associated with the expression level of 3' UTR rather than the gene expression level. We then cross-  
257 referenced these QTLs against the NHGRI-EBI GWAS catalog<sup>41,42</sup> and identified 79 GWAS variants that  
258 were significantly associated with expression levels of DEU 3' UTRs in 11 genes. The most significant  
259 QTLs were associated with the up-used 3' UTR in *ERAP1* (Supplementary Table ST11), an endoplasmic  
260 reticulum-expressed aminopeptidase that trims peptides for presentation by MHC class I  
261 molecules<sup>43</sup>. The minor allele of the lead QTL variant for *ERAP1*, rs7063, disrupts a canonical poly(A)  
262 motif AATAAA for the proximal poly(A) site, leading to increased usage of the distal poly(A) site and  
263 an isoform switch from the shorter isoform ENST00000443439 to the longer isoform  
264 ENST00000296754 with extended 3' UTR (Fig. 8a-c). Although rs7063 is not cataloged in the NHGRI-  
265 EBI GWAS database, it has linkage disequilibrium (LD) to various degrees with nearby QTLs and GWAS  
266 variants including those associated with protein expression levels, alcohol dependence, ankylosing  
267 spondylitis and psoriasis (Fig. 8d). These results implicate alternative polyadenylation in  
268 posttranscriptional protein level modulation and smoking-related diseases and traits<sup>44-46</sup>.

## 269 Discussion

270 Cigarette smoking increases susceptibility to many diseases including chronic obstructive  
271 pulmonary disease, cardiovascular disease, and multiple cancers. While the epidemiologic association  
272 of smoking to these disease risks is well-established, the underlying molecular basis is not fully  
273 understood, and the effects of smoking on alternative isoform regulation and posttranscriptional  
274 modulation have not been previously described. In a large cohort of current and former smokers, we  
275 used whole-blood RNA-seq to characterize the alternative splicing mechanisms and likely functional  
276 consequences of smoking-associated isoform switching. We demonstrated that smoking results in  
277 marked 3' UTR elongation via alternative polyadenylation of genes enriched for specific biological  
278 pathways with disease implications. This 3' UTR lengthening leads to the acquisition of post-  
279 transcriptional regulatory sites and is often associated with decreased overall expression of the  
280 affected genes.

281 The effect of smoking on gene expression in blood has been well-described<sup>14,47-50</sup>. The largest  
282 meta-analysis of smoking and blood transcriptome included 10,233 subjects, identifying 1,270  
283 differentially expressed genes<sup>50</sup>. Our top associated genes were consistent with these previous  
284 studies. The only previous large-scale study related to alternative splicing in smoking was published  
285 on an earlier, smaller set of RNA-seq data from COPDGene<sup>14</sup>. This study identified 9 instances of DEU  
286 events but did not pursue analysis on isoform expression changes and switches, and the statistical  
287 power of that study was insufficient to systematically characterize alternative isoform regulation and  
288 posttranscriptional modulation in smoking. Expanding to twice as many subjects in the current study  
289 enabled us to identify hundreds of genes and biological pathways affected by smoking-associated  
290 isoform switching and APA events.

291 APA is a major RNA-processing mechanism that generates distinct 3' termini on mRNAs and  
292 other RNA polymerase II transcripts, and contributes to human diseases including cancer,

293 immunological and neurological diseases<sup>51</sup>. APA plays an important role in the cellular response to  
294 oxidative stress, heat shock and starvation<sup>52</sup>. Various kinds of environmental stress have been shown  
295 to increase utilization of distal polyadenylation sites<sup>53</sup> and lead to transcriptional readthrough beyond  
296 annotated gene ends<sup>54</sup>. These observations suggest that APA may be a common posttranscriptional  
297 mechanism employed by mammalian cells when rapid modulations of RNA and protein levels are  
298 required in response to cellular stress. Smoking could be one of a larger class of exposures that elicits  
299 this posttranscriptional stress response, and additional studies of RNA-protein binding, RNA stability  
300 and trafficking are needed to elucidate its full spectrum of posttranscriptional modulations.

301 While previous genome-wide association studies (GWAS) have identified numerous genetic  
302 variants associated with smoking and smoking-related phenotypes<sup>55-60</sup>, functional interpretation of  
303 these variants remains challenging. Genetic variants could directly alter poly(A) motifs and RBP  
304 binding sites to modulate APA events, and several studies have been undertaken in recent years to  
305 systematically map novel apaQTLs and their disease etiologies<sup>61-64</sup>. Our preliminary 3' UTR eQTL  
306 analysis in the current study suggests APA as a potential molecular phenotype to link genetic variants  
307 to smoking-related human diseases and traits. Further systematic apaQTL studies are needed to  
308 identify APA-related genetic-environment interactions conferring disease susceptibility.

309 The strengths of this study are the large sample size of RNA-seq data and the genome-wide  
310 assessment of alternative isoform regulation and posttranscriptional modulation in smoking. Our CBC  
311 quantifications do not capture variability of immune cell subpopulations, limiting our ability to localize  
312 these effects to specific cell types. Some of our results may reflect underlying changes in unmeasured  
313 cell type subpopulations. In future studies, the use of single cell data (scRNA-seq) or cell type  
314 deconvolution methods may provide additional insights. scRNA-seq may offer unique advantage in  
315 studying APA as the most popular scRNA-seq protocols specifically sequence the 3' end of  
316 transcripts<sup>65</sup>.



317 In conclusion, our findings from 1,221 current and former smokers demonstrate widespread  
318 effects of smoking on alternative isoform regulation, highlighting specifically posttranscriptional  
319 mechanisms of APA and 3' UTR lengthening. In the future, when longitudinal follow-up data are  
320 available for these subjects, we may be able to relate these posttranscriptional events to prospective  
321 health outcomes, and develop APA biomarkers and therapeutic targets for smoking-related  
322 diseases<sup>66</sup>.  
323

**Funding/Acknowledgements:** This work was funded by R01 HL124233, R01 HL147326, R01 HL111527, U01 HL089897, U01 HL089856, R01HL125583, R01HL130512, R01 GM101237, R01 HL11152, K25HL140186 and K08HL141601. Research reported in this publication was supported by the NHLBI, NIGMS and FDA Center for Tobacco Products (CTP). The content is solely the responsibility of the authors and does not necessarily represent the official views of the NIH or the Food and Drug Administration.

**COPDGene® Investigators – Core Units:**

Administrative Center: James D. Crapo, MD (PI); Edwin K. Silverman, MD, PhD (PI); Barry J. Make, MD; Elizabeth A. Regan, MD, PhD

Genetic Analysis Center: Terri Beaty, PhD; Ferdouse Begum, PhD; Peter J. Castaldi, MD, MSc; Michael Cho, MD; Dawn L. DeMeo, MD, MPH; Adel R. Boueiz, MD; Marilyn G. Foreman, MD, MS; Eitan Halper-Stromberg; Lystra P. Hayden, MD, MMSc; Craig P. Hersh, MD, MPH; Jacqueline Hetmanski, MS, MPH; Brian D. Hobbs, MD; John E. Hokanson, MPH, PhD; Nan Laird, PhD; Christoph Lange, PhD; Sharon M. Lutz, PhD; Merry-Lynn McDonald, PhD; Dandi Qiao, PhD; Elizabeth A. Regan, MD, PhD; Edwin K. Silverman, MD, PhD; Emily S. Wan, MD; Sungho Won, PhD

Imaging Center: Juan Pablo Centeno; Jean-Paul Charbonnier, PhD; Harvey O. Coxson, PhD; Craig J. Galban, PhD; MeiLan K. Han, MD, MS; Eric A. Hoffman, Stephen Humphries, PhD; Francine L. Jacobson, MD, MPH; Philip F. Judy, PhD; Ella A. Kazerooni, MD; Alex Kluiber; David A. Lynch, MB; Pietro Nardelli, PhD; John D. Newell, Jr., MD; Aleena Notary; Andrea Oh, MD; Elizabeth A. Regan, MD, PhD; James C. Ross, PhD; Raul San Jose Estepar, PhD; Joyce Schroeder, MD; Jered Sieren; Berend C. Stoel, PhD; Juerg Tschirren, PhD; Edwin Van Beek, MD, PhD; Bram van Ginneken, PhD; Eva van Rikxoort, PhD; Gonzalo Vegas Sanchez-Ferrero, PhD; Lucas Veitel; George R. Washko, MD; Carla G. Wilson, MS;

PFT QA Center, Salt Lake City, UT: Robert Jensen, PhD

Data Coordinating Center and Biostatistics, National Jewish Health, Denver, CO: Douglas Everett, PhD; Jim Crooks, PhD; Katherine Pratte, PhD; Matt Strand, PhD; Carla G. Wilson, MS

Epidemiology Core, University of Colorado Anschutz Medical Campus, Aurora, CO: John E. Hokanson, MPH, PhD; Gregory Kinney, MPH, PhD; Sharon M. Lutz, PhD; Kendra A. Young, PhD

Mortality Adjudication Core: Surya P. Bhatt, MD; Jessica Bon, MD; Alejandro A. Diaz, MD, MPH; MeiLan K. Han, MD, MS; Barry Make, MD; Susan Murray, ScD; Elizabeth Regan, MD; Xavier Soler, MD; Carla G. Wilson, MS

Biomarker Core: Russell P. Bowler, MD, PhD; Katerina Kechris, PhD; Farnoush Banaei-Kashani, Ph.D  
COPDGene® Investigators – Clinical Centers  
Ann Arbor VA: Jeffrey L. Curtis, MD; Perry G. Pernicano, MD

Baylor College of Medicine, Houston, TX: Nicola Hanania, MD, MS; Mustafa Atik, MD; Aladin Boriek, PhD; Kalpatha Guntupalli, MD; Elizabeth Guy, MD; Amit Parulekar, MD

Brigham and Women's Hospital, Boston, MA: Dawn L. DeMeo, MD, MPH; Alejandro A. Diaz, MD, MPH; Lystra P. Hayden, MD; Brian D. Hobbs, MD; Craig Hersh, MD, MPH; Francine L. Jacobson, MD, MPH; George Washko, MD

Columbia University, New York, NY: R. Graham Barr, MD, DrPH; John Austin, MD; Belinda D'Souza, MD; Byron Thomashow, MD

Duke University Medical Center, Durham, NC: Neil MacIntyre, Jr., MD; H. Page McAdams, MD; Lacey Washington, MD

Grady Memorial Hospital, Atlanta, GA: Eric Flenaugh, MD; Silanth Terpenning, MD

HealthPartners Research Institute, Minneapolis, MN: Charlene McEvoy, MD, MPH; Joseph Tashjian, MD

Johns Hopkins University, Baltimore, MD: Robert Wise, MD; Robert Brown, MD; Nadia N. Hansel, MD, MPH; Karen Horton, MD; Allison Lambert, MD, MHS; Nirupama Putcha, MD, MHS

Lundquist Institute for Biomedical Innovation at Harbor UCLA Medical Center, Torrance, CA: Richard Casaburi, PhD, MD; Alessandra Adami, PhD; Matthew Budoff, MD; Hans Fischer, MD; Janos Porszasz, MD, PhD; Harry Rossiter, PhD; William Stringer, MD

Michael E. DeBakey VAMC, Houston, TX: Amir Sharafkhaneh, MD, PhD; Charlie Lan, DO

Minneapolis VA: Christine Wendt, MD; Brian Bell, MD; Ken M. Kunisaki, MD, MS

National Jewish Health, Denver, CO: Russell Bowler, MD, PhD; David A. Lynch, MB

Reliant Medical Group, Worcester, MA: Richard Rosiello, MD; David Pace, MD

Temple University, Philadelphia, PA: Gerard Criner, MD; David Ciccolella, MD; Francis Cordova, MD; Chandra Dass, MD; Gilbert D'Alonzo, DO; Parag Desai, MD; Michael Jacobs, PharmD; Steven Kelsen, MD, PhD; Victor Kim, MD; A. James Mamary, MD; Nathaniel Marchetti, DO; Aditi Satti, MD; Kartik Shenoy, MD; Robert M. Steiner, MD; Alex Swift, MD; Irene Swift, MD; Maria Elena Vega-Sanchez, MD

University of Alabama, Birmingham, AL: Mark Dransfield, MD; William Bailey, MD; Surya P. Bhatt, MD; Anand Iyer, MD; Hrudaya Nath, MD; J. Michael Wells, MD

University of California, San Diego, CA: Douglas Conrad, MD; Xavier Soler, MD, PhD; Andrew Yen, MD

University of Iowa, Iowa City, IA: Alejandro P. Comellas, MD; Karin F. Hoth, PhD; John Newell, Jr., MD; Brad Thompson, MD

University of Michigan, Ann Arbor, MI: MeiLan K. Han, MD MS; Ella Kazerooni, MD MS; Wassim Labaki, MD MS; Craig Galban, PhD; Dharshan Vummidi, MD

University of Minnesota, Minneapolis, MN: Joanne Billings, MD; Abbie Begnaud, MD; Tadashi Allen, MD

University of Pittsburgh, Pittsburgh, PA: Frank Scieurba, MD; Jessica Bon, MD; Divay Chandra, MD, MSc; Carl Fuhrman, MD; Joel Weissfeld, MD, MPH

University of Texas Health, San Antonio, San Antonio, TX: Antonio Anzueto, MD; Sandra Adams, MD; Diego Maselli-Caceres, MD; Mario E. Ruiz, MD; Harjinder Singh

**Conflict of Interest Statement:** P. Castaldi has received personal fees and grant support from GlaxoSmithKline, Bayer, and Novartis. C. Hersh has received grants from NHLBI, Bayer, Boehringer-Ingelheim, Novartis and Vertex. A. Laederach has received consultant fees from Ribometrix.

## References

1. Fiore, M. C. Trends in cigarette smoking in the United States: The epidemiology of tobacco use. *Medical Clinics of North America* vol. 76 289–303 (1992).
2. Fagerström, K. The epidemiology of smoking: Health consequences and benefits of cessation. *Drugs* vol. 62 1–9 (2002).
3. Sasco, A. J., Secretan, M. B. & Straif, K. Tobacco smoking and cancer: A brief review of recent epidemiological evidence. *Lung Cancer* **45**, 3–9 (2004).
4. Tonstad, S. & Johnston, J. A. Cardiovascular risks associated with smoking: A review for clinicians. *Eur. J. Prev. Cardiol.* **13**, 507–514 (2006).
5. Willi, C., Bodenmann, P., Ghali, W. A., Faris, P. D. & Cornuz, J. Active smoking and the risk of type 2 diabetes: A systematic review and meta-analysis. *J. Am. Med. Assoc.* **298**, 2654–2664 (2007).
6. Ekpu, V. U. & Brown, A. K. The Economic Impact of Smoking and of Reducing Smoking Prevalence: Review of Evidence. *Tob. Use Insights* **8**, TUI.S15628 (2015).
7. Anthonisen, N. R. *et al.* The effects of a smoking cessation intervention on 14.5-year mortality: A randomized clinical trial. *Ann. Intern. Med.* **142**, 233–239 (2005).
8. Bossé, Y. *et al.* Molecular signature of smoking in human lung tissues. *Cancer Res.* **72**, 3753–3763 (2012).
9. Beane, J. *et al.* Reversible and permanent effects of tobacco smoke exposure on airway epithelial gene expression. *Genome Biol.* **8**, (2007).
10. Wang, E. T. *et al.* Alternative isoform regulation in human tissue transcriptomes. *Nature* **456**, 470–476 (2008).
11. Reyes, A. & Huber, W. Alternative start and termination sites of transcription drive most transcript isoform differences across human tissues. *Nucleic Acids Res.* **46**, 582–592 (2018).
12. Kwan, T. *et al.* Genome-wide analysis of transcript isoform variation in humans. *Nat. Genet.* **40**, 225–231 (2008).
13. Tazi, J., Bakkour, N. & Stamm, S. Alternative splicing and disease. *Biochim. Biophys. Acta - Mol. Basis Dis.* **1792**, 14–26 (2009).
14. Parker, M. M. *et al.* RNA sequencing identifies novel non-coding RNA and exon-specific effects associated with cigarette smoking. *BMC Med. Genomics* **10**, 1–10 (2017).
15. Vitting-Seerup, K. & Sandelin, A. The landscape of isoform switches in human cancers. *Mol. Cancer Res.* **15**, 1206–1220 (2017).
16. Regan, E. A. *et al.* Genetic epidemiology of COPD (COPDGene) study design. *COPD J. Chronic Obstr. Pulm. Dis.* **7**, 32–43 (2010).
17. Gillenwater, L. A. *et al.* Metabolomic profiling reveals sex specific associations with chronic obstructive pulmonary disease and emphysema. *Metabolites* **11**, 161 (2021).
18. Anders, S., Reyes, A. & Huber, W. Detecting differential usage of exons from RNA-Seq data. *Nat. Preced.* 1–30 (2012) doi:10.1038/npre.2012.6837.2.
19. Liao, Y., Smyth, G. K. & Shi, W. The Subread aligner: Fast, accurate and scalable read mapping by seed-and-vote. *Nucleic Acids Res.* **41**, e108–e108 (2013).
20. Patro, R., Duggal, G., Love, M. I., Irizarry, R. A. & Kingsford, C. Salmon provides fast and bias-aware quantification of transcript expression. *Nat. Methods* **14**, 417–419 (2017).
21. Sonesson, C., Love, M. I. & Robinson, M. D. Differential analyses for RNA-seq: Transcript-level estimates improve gene-level inferences [version 2; referees: 2 approved]. *F1000Research* **4**, (2016).
22. Robinson, M. D. & Oshlack, A. A scaling normalization method for differential expression analysis of RNA-seq data. *Genome Biol.* **11**, R25 (2010).
23. Robinson, M. D., McCarthy, D. J. & Smyth, G. K. edgeR: a Bioconductor package for differential expression analysis of digital gene expression data. *Bioinformatics* **26**, 139–140 (2010).

24. Ritchie, M. E. *et al.* Limma powers differential expression analyses for RNA-sequencing and microarray studies. *Nucleic Acids Res.* **43**, e47 (2015).
25. Phipson, B., Lee, S., Majewski, I. J., Alexander, W. S. & Smyth, G. K. Robust hyperparameter estimation protects against hypervariable genes and improves power to detect differential expression. *Ann. Appl. Stat.* **10**, 946–963 (2016).
26. Law, C. W., Chen, Y., Shi, W. & Smyth, G. K. Voom: Precision weights unlock linear model analysis tools for RNA-seq read counts. *Genome Biol.* **15**, R29 (2014).
27. Benjamini, Y. & Hochberg, Y. Controlling the False Discovery Rate: A Practical and Powerful Approach to Multiple Testing. *J. R. Stat. Soc. Ser. B* **57**, 289–300 (1995).
28. Ashburner, M. *et al.* Gene ontology: Tool for the unification of biology. *Nature Genetics* vol. 25 25–29 (2000).
29. Blake, J. A. *et al.* Gene ontology consortium: Going forward. *Nucleic Acids Res.* **43**, D1049–D1056 (2015).
30. Alexa, A., Rahnenfuhrer, J. & Lengauer, T. Improved scoring of functional groups from gene expression data by decorrelating GO graph structure. *Bioinformatics* **22**, 1600–1607 (2006).
31. Vitting-Seerup, K. & Sandelin, A. IsoformSwitchAnalyzeR: analysis of changes in genome-wide patterns of alternative splicing and its functional consequences. *Bioinformatics* **35**, 4469–4471 (2019).
32. Fruchterman, T. M. J. & Reingold, E. M. Graph drawing by force-directed placement. *Softw. Pract. Exp.* **21**, 1129–1164 (1991).
33. Shabalin, A. A. Matrix eQTL: Ultra fast eQTL analysis via large matrix operations. *Bioinformatics* **28**, 1353–1358 (2012).
34. Stegle, O., Parts, L., Piipari, M., Winn, J. & Durbin, R. Using probabilistic estimation of expression residuals (PEER) to obtain increased power and interpretability of gene expression analyses. *Nat. Protoc.* **7**, 500–507 (2012).
35. Pruim, R. J. *et al.* LocusZoom: Regional visualization of genome-wide association scan results. in *Bioinformatics* vol. 27 2336–2337 (Oxford University Press, 2011).
36. Edgar, R., Domrachev, M. & Lash, A. E. Gene Expression Omnibus: NCBI gene expression and hybridization array data repository. *Nucleic Acids Res.* **30**, 207–210 (2002).
37. Barrett, T. *et al.* NCBI GEO: Archive for functional genomics data sets - Update. *Nucleic Acids Res.* **41**, D991–D995 (2013).
38. Oshlack, A. & Wakefield, M. J. Transcript length bias in RNA-seq data confounds systems biology. *Biol. Direct* **4**, 1–10 (2009).
39. Pai, A. A. *et al.* Widespread Shortening of 3' Untranslated Regions and Increased Exon Inclusion Are Evolutionarily Conserved Features of Innate Immune Responses to Infection. *PLoS Genet.* **12**, (2016).
40. Plass, M., Rasmussen, S. H. & Krogh, A. Highly accessible AU-rich regions in 3' untranslated regions are hotspots for binding of regulatory factors. *PLoS Comput. Biol.* **13**, (2017).
41. MacArthur, J. *et al.* The new NHGRI-EBI Catalog of published genome-wide association studies (GWAS Catalog). *Nucleic Acids Res.* **45**, D896–D901 (2017).
42. Buniello, A. *et al.* The NHGRI-EBI GWAS Catalog of published genome-wide association studies, targeted arrays and summary statistics 2019. *Nucleic Acids Res.* **47**, D1005–D1012 (2019).
43. Haroon, N. & Inman, R. D. Endoplasmic reticulum aminopeptidases: Biology and pathogenic potential. *Nature Reviews Rheumatology* vol. 6 461–467 (2010).
44. Kalman, D., Kim, S., DiGirolamo, G., Smelson, D. & Ziedonis, D. Addressing tobacco use disorder in smokers in early remission from alcohol dependence: The case for integrating smoking cessation services in substance use disorder treatment programs. *Clinical Psychology Review* vol. 30 12–24 (2010).
45. Videm, V., Cortes, A., Thomas, R. & Brown, M. A. Current smoking is associated with incident ankylosing spondylitis - The HUNT population-based Norwegian health study. *J. Rheumatol.* **41**, 204–211 (2014).
46. Armstrong, A. W., Harskamp, C. T., Dhillon, J. S. & Armstrong, E. J. Psoriasis and smoking: A systematic review and meta-analysis. *British Journal of Dermatology* vol. 170 304–314 (2014).
47. Charlesworth, J. C. *et al.* Transcriptomic epidemiology of smoking: The effect of smoking on gene

- expression in lymphocytes. *BMC Med. Genomics* **3**, (2010).
48. Vink, J. M. *et al.* Differential gene expression patterns between smokers and non-smokers: cause or consequence? *Addict. Biol.* **22**, 550–560 (2017).
  49. Beineke, P. *et al.* A whole blood gene expression-based signature for smoking status. *BMC Med. Genomics* **5**, (2012).
  50. Huan, T. *et al.* A whole-blood transcriptome meta-analysis identifies gene expression signatures of cigarette smoking. *Hum. Mol. Genet.* **25**, 4611–4623 (2016).
  51. Gruber, A. J. & Zavolan, M. Alternative cleavage and polyadenylation in health and disease. *Nature Reviews Genetics* vol. 20 599–614 (2019).
  52. Sadek, J., Omer, A., Hall, D., Ashour, K. & Gallouzi, I. E. Alternative polyadenylation and the stress response. *Wiley Interdiscip. Rev. RNA* **10**, e1540 (2019).
  53. Hollerer, I. *et al.* The differential expression of alternatively polyadenylated transcripts is a common stress-induced response mechanism that modulates mammalian mRNA expression in a quantitative and qualitative fashion. *RNA* **22**, 1441–1453 (2016).
  54. Vilborg, A. *et al.* Comparative analysis reveals genomic features of stress-induced transcriptional readthrough. *Proc. Natl. Acad. Sci. U. S. A.* **114**, E8362–E8371 (2017).
  55. Xu, K. *et al.* Genome-wide association study of smoking trajectory and meta-analysis of smoking status in 842,000 individuals. *Nat. Commun.* **11**, 1–11 (2020).
  56. Furberg, H. *et al.* Genome-wide meta-analyses identify multiple loci associated with smoking behavior. *Nat. Genet.* **42**, 441–447 (2010).
  57. Liu, M. *et al.* Association studies of up to 1.2 million individuals yield new insights into the genetic etiology of tobacco and alcohol use. *Nature Genetics* vol. 51 237–244 (2019).
  58. Erzurumluoglu, A. M. *et al.* Meta-analysis of up to 622,409 individuals identifies 40 novel smoking behaviour associated genetic loci. *Mol. Psychiatry* **25**, 2392–2409 (2020).
  59. Siedlinski, M. *et al.* Genome-wide association study of smoking behaviours in patients with COPD. *Thorax* **66**, 894–902 (2011).
  60. Thorgeirsson, T. E. *et al.* Sequence variants at CHRN3-CHRNA6 and CYP2A6 affect smoking behavior. *Nat. Genet.* **42**, 448–453 (2010).
  61. Mittleman, B. E. *et al.* Alternative polyadenylation mediates genetic regulation of gene expression. *Elife* **9**, 1–21 (2020).
  62. Yang, Y. *et al.* SNP2APA: A database for evaluating effects of genetic variants on alternative polyadenylation in human cancers. *Nucleic Acids Res.* **48**, D226–D232 (2020).
  63. Li, L., Gao, Y., Peng, F., Wagner, E. J. & Li, W. Genetic Basis of Alternative Polyadenylation is an Emerging Molecular Phenotype for Human Traits and Diseases. *SSRN Electron. J.* (2019) doi:10.2139/ssrn.3351825.
  64. Mariella, E., Marotta, F., Grassi, E., Gilotto, S. & Provero, P. The length of the expressed 3' UTR is an intermediate molecular phenotype linking genetic variants to complex diseases. *Front. Genet.* **10**, 714 (2019).
  65. Shulman, E. D. & Elkon, R. Cell-type-specific analysis of alternative polyadenylation using single-cell transcriptomics data. *Nucleic Acids Res.* **47**, 10027–10039 (2019).
  66. Ren, F., Zhang, N., Zhang, L., Miller, E. & Pu, J. J. Alternative Polyadenylation: a new frontier in post transcriptional regulation. *Biomarker Research* vol. 8 67 (2020).

| Ensembl gene ID | HUGO gene name   | Chromosome | Strand | Log fold change | Average expression | Adjusted P-value |
|-----------------|------------------|------------|--------|-----------------|--------------------|------------------|
| ENSG00000154165 | <i>GPR15</i>     | 3          | +      | 1.36            | 4.43               | 3.61E-97         |
| ENSG00000253230 | <i>LINC00599</i> | 8          | -      | 1.65            | -2.67              | 1.38E-68         |
| ENSG00000173114 | <i>LRRN3</i>     | 7          | +      | 1.17            | 4.19               | 3.36E-55         |
| ENSG00000167680 | <i>SEMA6B</i>    | 19         | -      | 1.35            | -1.16              | 1.01E-47         |
| ENSG00000111961 | <i>SASH1</i>     | 6          | +      | 0.73            | 3.03               | 6.66E-45         |
| ENSG00000063438 | <i>AHRR</i>      | 5          | +      | 1.20            | -0.26              | 3.54E-42         |
| ENSG00000077063 | <i>CTTNBP2</i>   | 7          | -      | 1.30            | -0.70              | 1.59E-41         |
| ENSG00000153823 | <i>PID1</i>      | 2          | -      | 0.51            | 4.03               | 1.10E-39         |
| ENSG00000124334 | <i>IL9R</i>      | X          | +      | 0.90            | -0.40              | 1.48E-32         |
| ENSG00000080822 | <i>CLDND1</i>    | 3          | -      | 0.24            | 6.41               | 2.84E-26         |

**Table 1. Top 10 differentially expressed genes in current smokers versus former smokers.**

| Ensembl transcript ID | HUGO gene name  | Log fold change | Average log expression | Adjusted P-value |
|-----------------------|-----------------|-----------------|------------------------|------------------|
| ENST00000586582       | <i>SEMA6B</i>   | 1.54            | -1.41                  | 3.04E-21         |
| ENST00000589889       | <i>SEMA6B</i>   | -1.54           | 0.03                   | 3.04E-21         |
| ENST00000233156       | <i>TFPI</i>     | -0.87           | 0.76                   | 3.55E-14         |
| ENST00000244174       | <i>IL9R</i>     | 0.97            | -1.81                  | 1.78E-10         |
| ENST00000540368       | <i>ATP6VOA2</i> | -0.77           | -0.19                  | 2.66E-10         |
| ENST00000517625       | <i>SKP1</i>     | -0.43           | 4.11                   | 5.83E-10         |
| ENST00000278499       | <i>SESN3</i>    | -0.61           | 4.19                   | 9.34E-10         |
| ENST00000477931       | <i>GNAS</i>     | -0.56           | 4.13                   | 3.76E-09         |
| ENST00000362091       | <i>FBH1</i>     | -0.44           | 3.94                   | 3.76E-09         |
| ENST00000333007       | <i>TNFAIP2</i>  | -0.87           | 0.48                   | 3.80E-09         |

**Table 2. Top 10 differentially used Isoforms in current smokers versus former smokers.**



| GO ID      | GO term                                          | Total number of genes in category | Number of smoking-associated genes in category | P-value  |
|------------|--------------------------------------------------|-----------------------------------|------------------------------------------------|----------|
| GO:0043547 | positive regulation of GTPase activity           | 308                               | 45                                             | 1.00E-05 |
| GO:0046822 | regulation of nucleocytoplasmic transport        | 97                                | 12                                             | 3.10E-04 |
| GO:0006607 | NLS-bearing protein import into nucleus          | 24                                | 7                                              | 9.50E-04 |
| GO:0010172 | embryonic body morphogenesis                     | 9                                 | 5                                              | 1.27E-03 |
| GO:0008053 | mitochondrial fusion                             | 19                                | 7                                              | 1.30E-03 |
| GO:0045088 | regulation of innate immune response             | 300                               | 21                                             | 1.30E-03 |
| GO:0034497 | protein localization to phagophore assembly site | 13                                | 5                                              | 1.31E-03 |
| GO:0006610 | ribosomal protein import into nucleus            | 8                                 | 4                                              | 1.31E-03 |
| GO:0075522 | IRES-dependent viral translational initiation    | 10                                | 4                                              | 3.51E-03 |
| GO:0016055 | Wnt signaling pathway                            | 289                               | 34                                             | 3.68E-03 |

**Table 3. Top 10 gene ontology biological processes enriched in genes with differentially used isoforms in current smokers versus former smokers.**

| Functional elements | Count method        | Up-used 3' UTR |    | non-DEU 3' UTR |     |       |           |              |       |       |           |
|---------------------|---------------------|----------------|----|----------------|-----|-------|-----------|--------------|-------|-------|-----------|
|                     |                     |                |    | within genes   |     |       |           | across genes |       |       |           |
|                     |                     | yes            | no | yes            | no  | OR    | P-value   | yes          | no    | OR    | P-value   |
| poly(A) sites       | full length         | 50             | 6  | 117            | 425 | 30.08 | < 2.2e-16 | 23380        | 57386 | 20.45 | < 2.2e-16 |
|                     | last 100 bp         | 36             | 20 | 113            | 429 | 6.81  | 5.14E-11  | 20930        | 59836 | 5.15  | 1.88E-09  |
|                     | last 100 bp density | 47             | 0  | 151            | 0   | 3.01  | 2.13E-09  | 26213        | 0     | 2.59  | 1.26E-08  |
| ARE                 | full length         | 51             | 5  | 76             | 466 | 61.92 | < 2.2e-16 | 17854        | 62912 | 35.94 | < 2.2e-16 |
|                     | last 100 bp         | 24             | 32 | 58             | 484 | 6.23  | 1.13E-08  | 11731        | 69035 | 4.41  | 2.88E-07  |
|                     | last 100 bp density | 35             | 0  | 70             | 0   | 4.84  | 1.12E-11  | 14262        | 0     | 3.54  | 4.67E-10  |
| miRNA binding sites | full length         | 36             | 20 | 88             | 454 | 9.23  | 7.09E-14  | 15172        | 65594 | 7.78  | 1.03E-13  |
|                     | last 100 bp         | 13             | 43 | 83             | 459 | 1.67  | 1.28E-01  | 10769        | 69997 | 1.97  | 4.57E-02  |
|                     | last 100 bp density | 33             | 0  | 164            | 0   | 1.95  | 1.27E-03  | 20823        | 0     | 2.29  | 2.78E-05  |

**Table 4. Summary of functional element enrichment in 3' UTRs.** Counts of each of the three types of

functional elements in a given set of 3' UTR exonic parts, as well as odds ratios and P-values of enrichment tests, are shown. The “full length” count method means counting the number of 3' UTR exonic parts that harbor at least one functional element. The “last 100 bp” means counting similarly to “full length” except trimming all 3' UTRs to include only the most distal 100 bp. The “last 100 bp density” counts the total number of functional elements in the last 100 bp of a given set of 3' UTRs. The “within genes” and “across genes” denotes comparisons done entirely within genes containing up-used 3' UTRs and comparisons done in all tested genes, respectively.

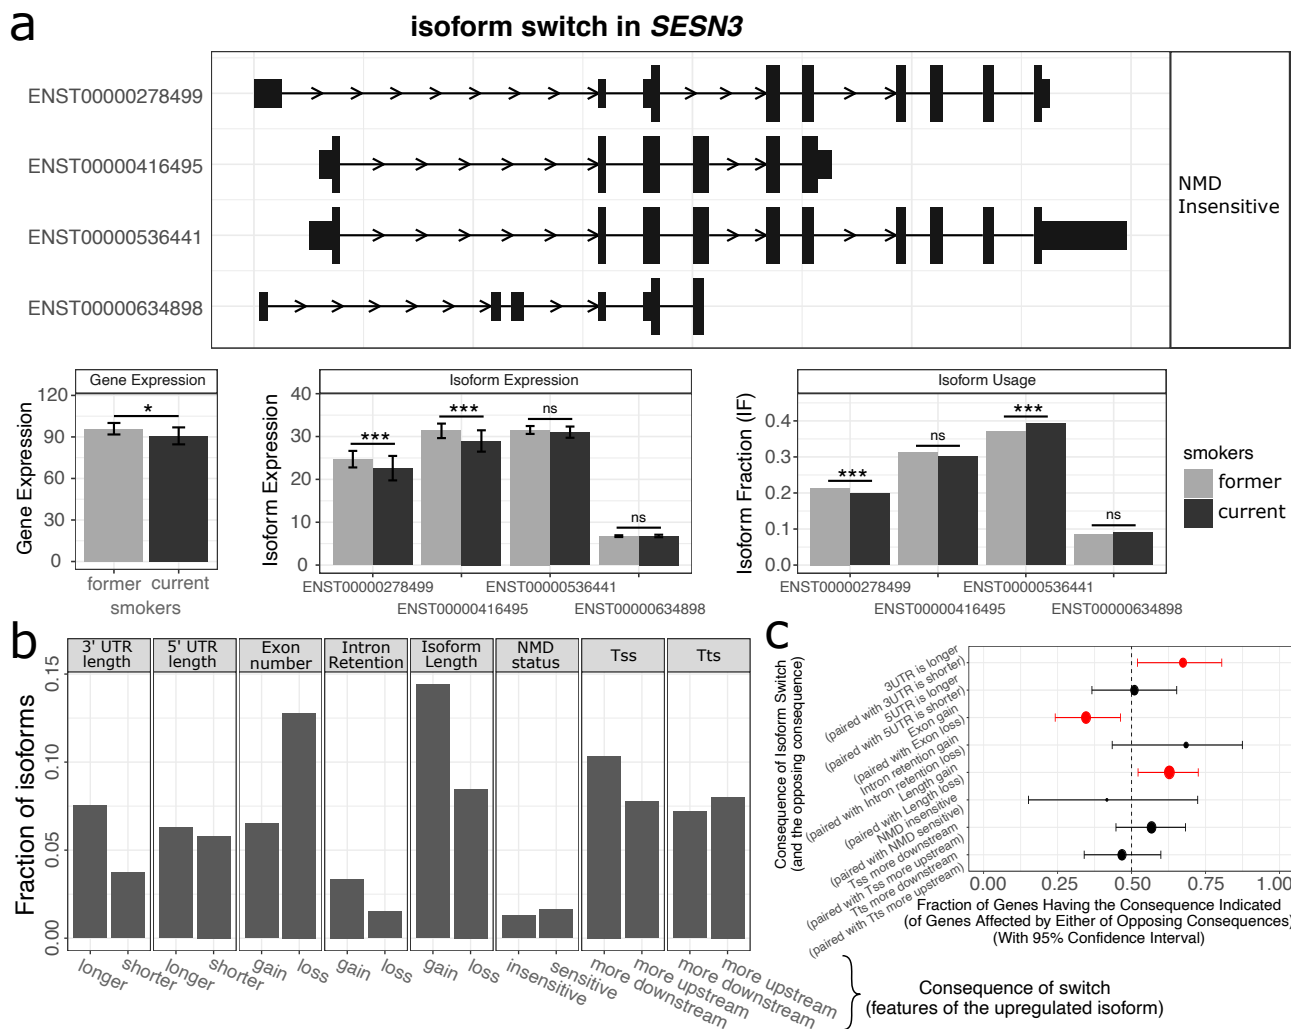

**Figure 1. Smoking-associated isoform switches and consequences.** An example of the identified isoform switches in the DIU analysis is shown in panel a, where only isoforms accounting for more than 5% of the gene expression are displayed. The statistical significance of DGE, DIE and DIU analysis is marked on the bar plots (\*: q-value < 0.1, \*\*\*: q-value < 0.01, ns: nonsignificant). In panel b, pairwise comparisons between up-used and down-used isoforms for all tested genes are performed to assess specific consequences of isoform switches (e.g. 3' UTR length is longer or shorter in up-used versus down-used isoforms from the same gene), and the fraction of DIU isoforms involved in a given type of switch consequence is shown. Panel c summarizes the net effects of these switch consequences at the gene level aggregated over all pairwise comparisons between up-used and down-used isoforms. Each gene will have a binary designation of its net switch consequence, and the fraction of genes with a particular designation and its confidence interval are shown. A binomial test is performed to assess

the statistical significance of the gene fractions with respect to a null hypothesis of 0.5. The dot size is proportional to the number of genes whose DIU isoforms have a given type of switch consequences, and statistical significance of the binomial test is indicated by red colored dots. NMD: nonsense-mediated mRNA decay, identified from a premature termination codon >50nt upstream of the last exon-exon junction. Tss: transcription start site. Tts: transcription termination site.

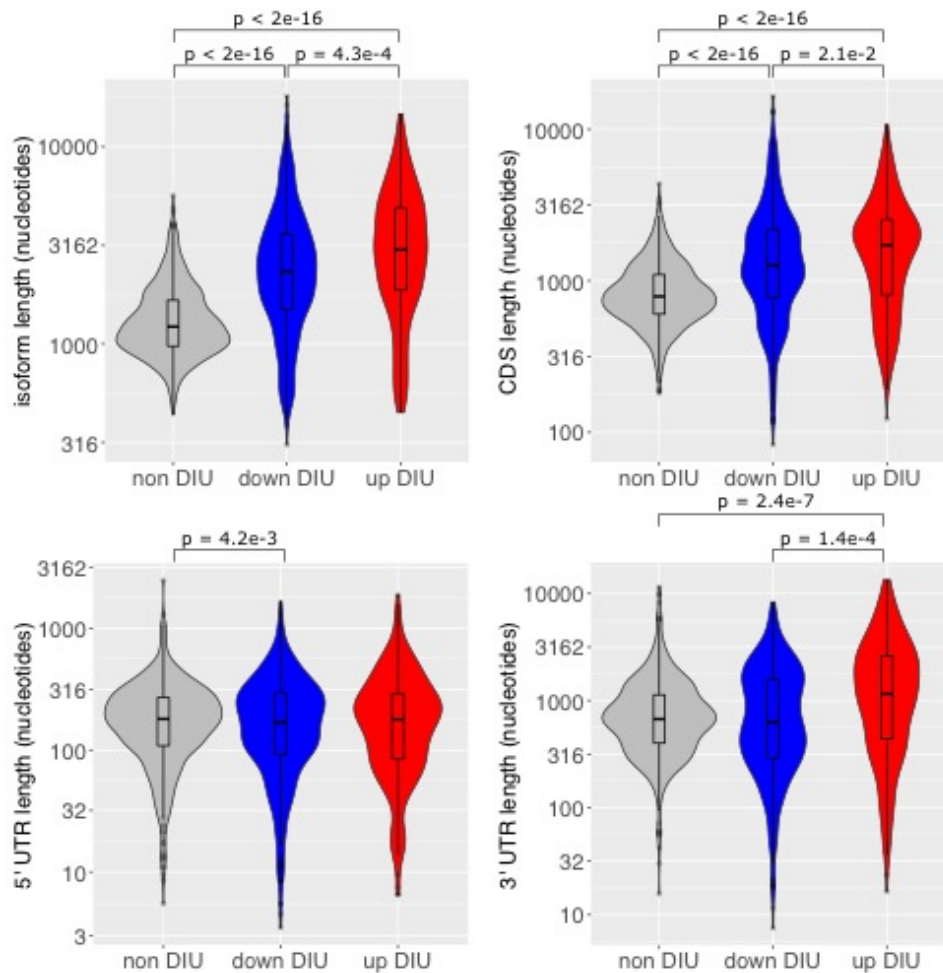

**Figure 2. 3' UTR lengthening with up-used DIU isoforms.** Isoforms were classified into three DIU categories (non-differentially used, down-used, up-used) according to their differential usage test statistics. Isoforms within each gene were grouped by category to compute average isoform length, 5' UTR length, 3' UTR length, and CDS length. These average lengths were compared across DIU categories using the Wilcoxon signed rank test, and the significant P-values are denoted in the violin plots. Significant differences in CDS and 3' UTR length were observed, especially in up-used DIU isoforms.

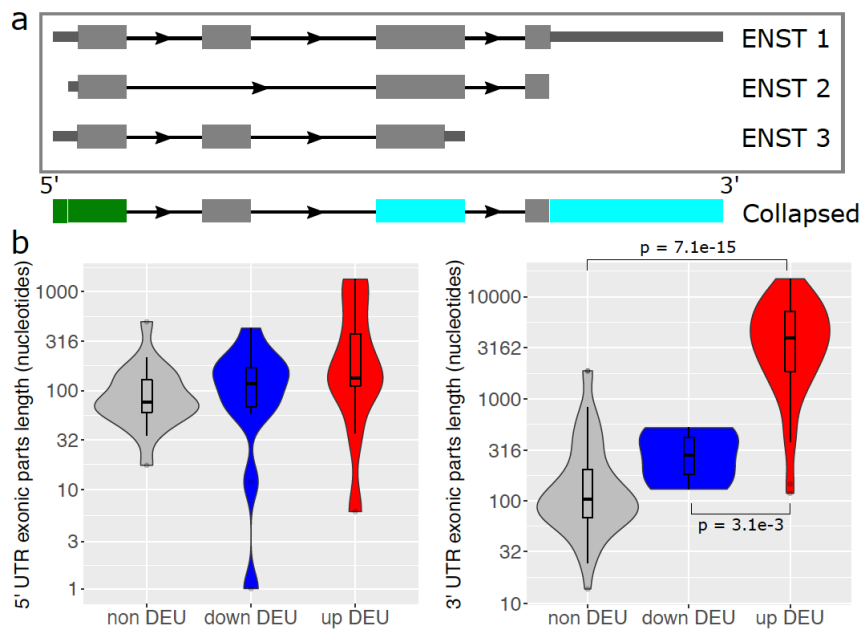

**Figure 3. 3' UTR lengthening of up-used DEU exonic parts.** Non-overlapping exonic parts were derived from collapsed Ensembl gene models, as illustrated in panel a. Exonic parts that overlap annotated 5' and 3' UTRs are colored in green and cyan, respectively. In panel b, exonic parts were classified into three DEU categories (non-differentially used, down-used, up-used) according to their differential usage test statistics. Exonic parts within each gene were grouped by category to compute the average 5' UTR and 3' UTR exonic parts length. These average lengths were compared between the three DEU categories using the Wilcoxon signed rank test, and the significant P-values are denoted in the violin plots. A significant increase in 3' UTR exonic part length was observed in up-used DEUs.

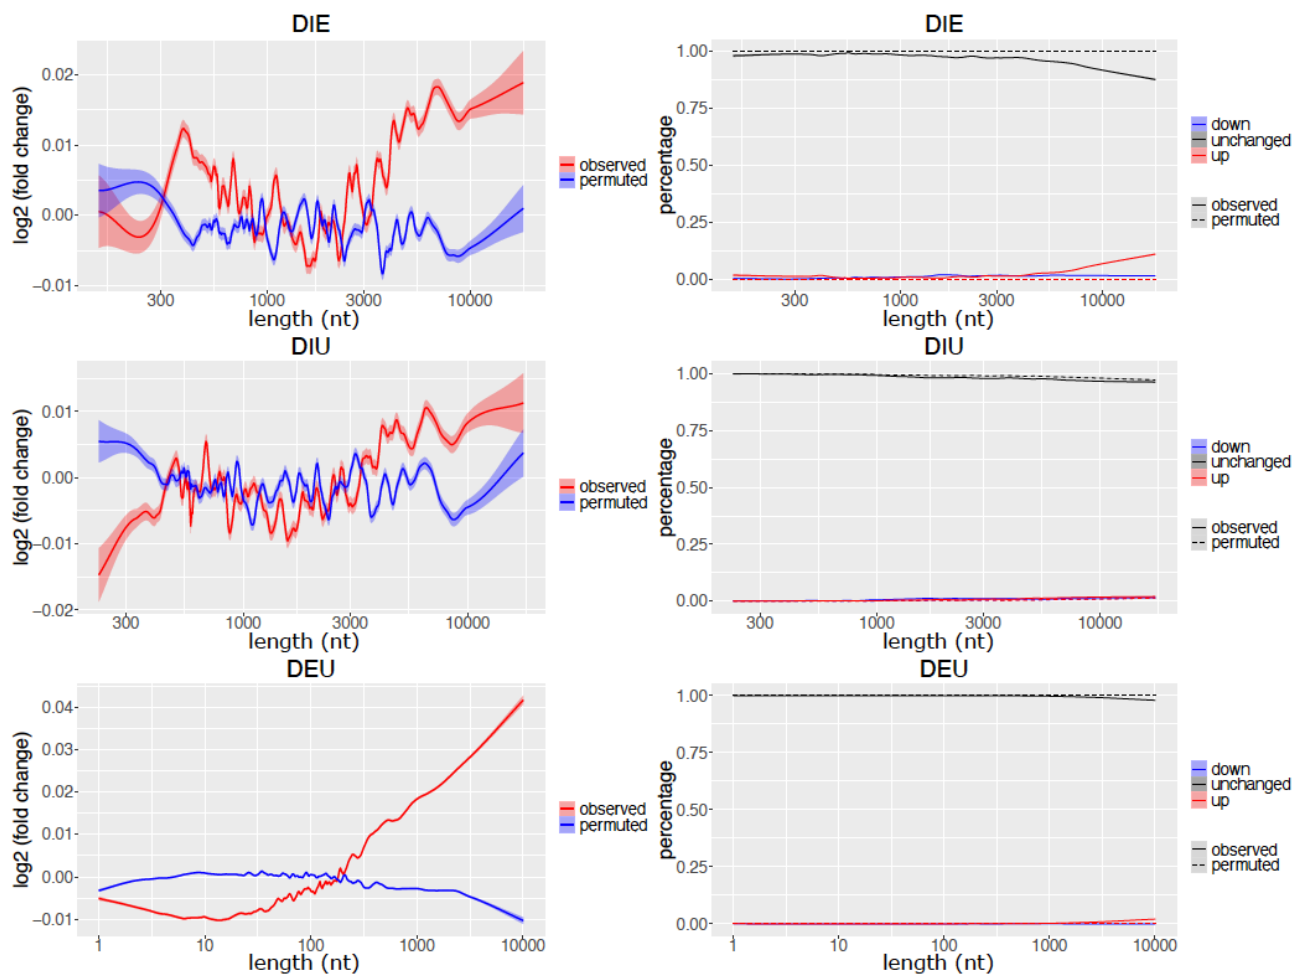

**Figure 4. Directional preference in smoking-induced transcriptional regulation in observed versus permuted data.** Left-hand panels demonstrate that a trend towards positive log fold changes (i.e. higher expression and usage in smokers) with longer features is present in the observed data but not the permuted data. Right-hand panels show the increasing percentage of features detected as up-regulated or up-used in smokers as the features become longer. Features were sorted by length, and statistics (average log fold changes and feature lengths) were computed from a sliding window of size 300 and step size 15 nts. A LOWESS curve was fit to these statistics and shown with 95% confidence interval in the left-hand panels for the three types of analysis (DIE, DIU and DEU) in both the observed and permuted data. In the right-hand panels, the percentage of features stratified by status of differential expression and usage were shown on the y axis.

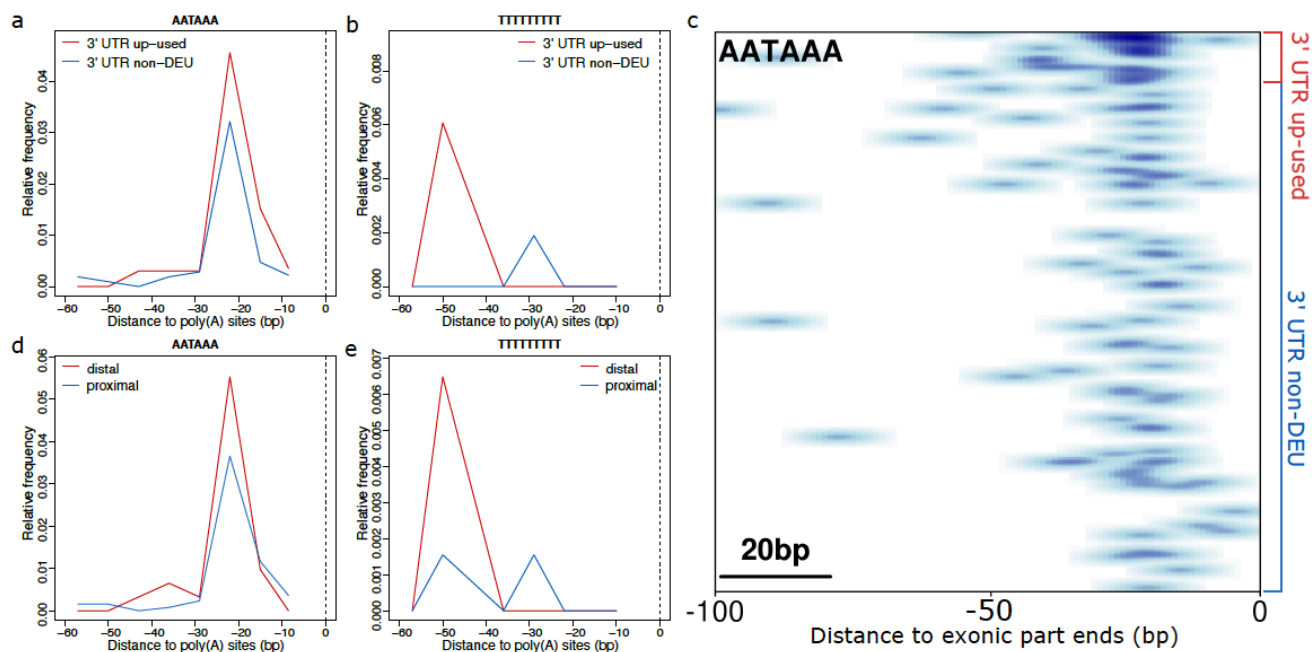

**Figure 5. Positional frequency of poly(A) motifs upstream of polyadenylation sites (PASs).** Genomic sequences upstream of PASs are extracted, and the frequencies of poly(A) motifs at each base position are computed and smoothed in the visualization. In panels a-b, PASs are categorized according to the DEU analysis of the 3' UTRs harboring these sites. In panels d-e, PASs are categorized as distal and proximal depending on their location relative to the annotated end of the gene. In panels a-b and d-e, the dashed lines mark the position of experimentally determined PAS cleavage sites in 3' UTR exonic parts from genes containing up-used 3' UTRs. In panel c, each row represents the last 100 nucleotides of a 3' UTR exonic part, ordered by DEU P-values.



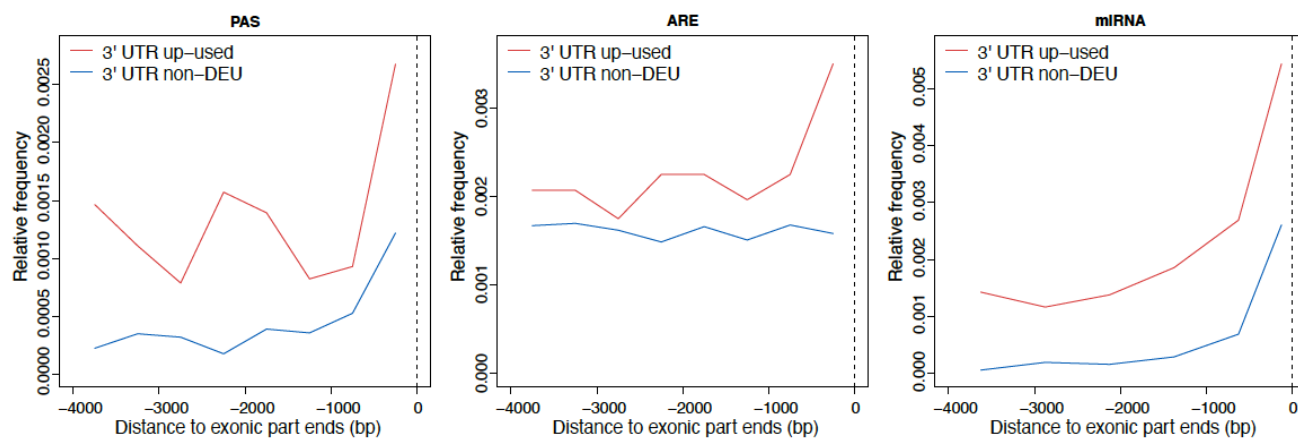

**Figure 6.** Positional frequency of functional elements in 3' UTRs. Genomic sequences up to 4 kb upstream of the 3' UTR exonic part ends are extracted, and the frequencies of functional elements (PAS, ARE, miRNA) at each base position are computed and smoothed in the visualization. The exonic parts analyzed here include all 3' UTRs from genes containing up-used 3' UTRs.

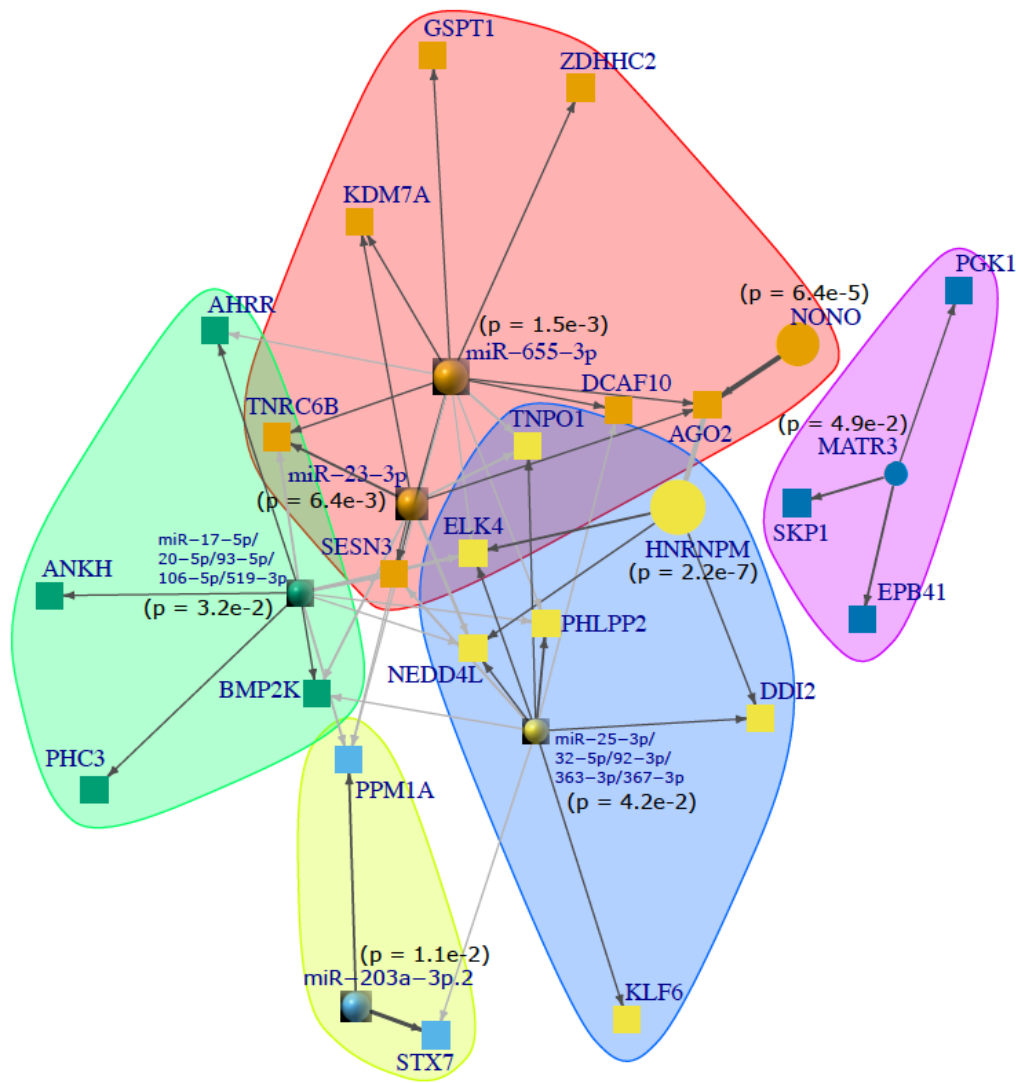

**Figure 7. Regulatory network of micro-RNAs (miRNAs), RNA-binding proteins (RBPs) and their target genes with up-used 3' UTRs.** Candidate regulatory factors (5 miRNAs and 3 RBPs) were identified from enrichment tests of binding sites from TargetScan and e-CLIP experiments in up-used 3' UTRs. Five network communities are designated by the node coloring and shaded polygons. p-values from the binomial enrichment tests are shown. Node size is proportional to the  $-\log_{10}$  transformed binomial p-values. Node shape: sphere = miRNA; circle = RBP; square = target gene. Edge width is proportional to the number of binding sites. Edge color designates the within (black) or between (gray) community links.

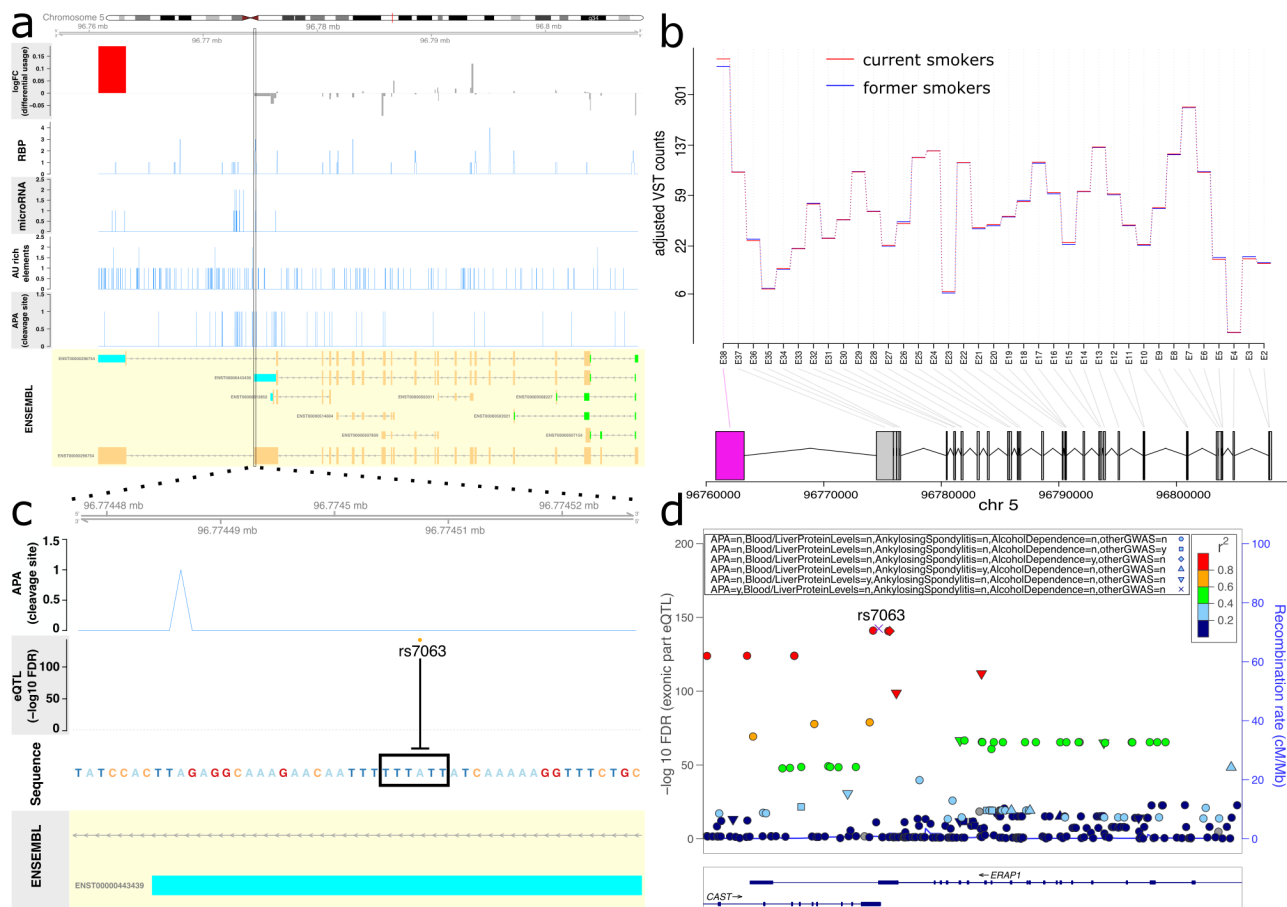

**Figure 8. Genetic effects on alternative polyadenylation in *ERAP1*.** Panel a shows sequentially in each row the differential usage log fold changes for the exonic parts, the coverage of RNA binding protein (RBP), miRNA, AU-rich elements (ARE), and alternative polyadenylation (APA) cleavage sites, and the Ensembl gene model for *ERAP1*. The exonic parts differential usage pattern is further illustrated in panel b using variance stabilized transformed (VST) counts adjusted for covariates. Panel c highlights the genetic variant directly disrupting the canonical poly(A) motif at the proximal poly(A) site. A LocusZoom plot is displayed in panel d, showing the eQTL FDR for the association of SNPs with the up-used 3' UTR of *ERAP1*. The SNPs are colored according to linkage disequilibrium with the lead eQTL variant rs7063, and are annotated based on the effects on APA motifs and annotations in NHGRI-EBI GWAS catalog (n and y in the top legend means lacking and having effect/association, respectively).
